# Supplementary material for: Mechanism of the Immunomodulatory Effect of the Combination of Live Bifidobacterium, Lactobacillus, Enterococcus, and Bacillus on Immunocompromised Rats
Source: Front Immunol. 2021 Jun 15;12:694344. doi: 10.3389/fimmu.2021.694344 (PMC8239396; doi:10.3389/fimmu.2021.694344)
Supplement: Supplementary file 3 [file Table_2.xlsx]

## Sheet: Sheet1
Supplementary Table 2. Cyclophosphamide-induced alterations in signal pathways in the colon.
KEGGID	Description	class	GeneRatio	BgRatio	pvalue	padj	geneID	geneName	GeneCount	Regulation
rno04510	Focal adhesion	Cellular Processes; Cellular community - eukaryotes	31/410	213/7555	3.81579e-07	1.35938e-05	ENSRNOG00000012471/ENSRNOG00000011292/ENSRNOG00000003897/ENSRNOG00000001254/ENSRNOG00000019648/ENSRNOG00000014288/ENSRNOG00000001249/ENSRNOG00000006723/ENSRNOG00000059903/ENSRNOG00000018951/ENSRNOG00000016281/ENSRNOG00000007027/ENSRNOG00000058645/ENSRNOG00000057710/ENSRNOG00000057451/ENSRNOG00000011134/ENSRNOG00000018373/ENSRNOG00000007281/ENSRNOG00000033581/ENSRNOG00000016538/ENSRNOG00000019598/…	Thbs4/Col1a2/Col1a1/Col6a2/Col6a3/Fn1/Col6a1/Itga11/Thbs3/Col4a5/Col4a1/Hgf/Tnc/Ccnd2/Itga5/Lama2/Tln2/Flnc/Tnxb/Itga8/Vegfa/Col4a6/Itgb8/Col4a2/Lama4/Cav2/Col6a5/Figf/Lamb1/Col4a4/Parvb	31	down
rno04151	PI3K-Akt signaling pathway	Environmental Information Processing; Signal transduction	57/410	376/7555	5.43507e-13	7.74498e-11	ENSRNOG00000012471/ENSRNOG00000011292/ENSRNOG00000003897/novel.1449/novel.1386/ENSRNOG00000001254/ENSRNOG00000010522/ENSRNOG00000055375/ENSRNOG00000019648/ENSRNOG00000014288/ENSRNOG00000060451/ENSRNOG00000001249/ENSRNOG00000006723/ENSRNOG00000059903/ENSRNOG00000018951/ENSRNOG00000016281/ENSRNOG00000007027/ENSRNOG00000055113/ENSRNOG00000021401/ENSRNOG00000009385/ENSRNOG00000058645/ENSRNOG000000577…	Thbs4/Col1a2/Col1a1/-/-/Col6a2/Tlr4/AABR07065837.1/Col6a3/Fn1/AABR07065643.1/Col6a1/Itga11/Thbs3/Col4a5/Col4a1/Hgf/AABR07065895.1/Lpar5/Pik3cg/Tnc/Ccnd2/Sgk1/Itga5/G6pc/Cd19/Lama2/Myb/Pik3r5/Prkaa2/Tnxb/Itga8/Ppp2r1b/Vegfa/Tsc2/Fgf10/Fgfr4/Col4a6/Itgb8/Col4a2/Igf2/AABR07065656.9/Lama4/Fgfr3/Phlpp1/Chrm1/Sgk3/Col6a5/LOC100359978/-/Figf/Angpt4/Lamb1/Angpt2/Pck1/Col4a4/AABR07065680.1	57	down
rno04020	Calcium signaling pathway	Environmental Information Processing; Signal transduction	35/410	225/7555	1.15238e-08	6.56855e-07	novel.1449/novel.1386/ENSRNOG00000051986/ENSRNOG00000055375/ENSRNOG00000060451/ENSRNOG00000007445/ENSRNOG00000052080/ENSRNOG00000004978/ENSRNOG00000007420/ENSRNOG00000055113/ENSRNOG00000054418/ENSRNOG00000049410/novel.1249/ENSRNOG00000024101/ENSRNOG00000001804/ENSRNOG00000053339/ENSRNOG00000010325/ENSRNOG00000016243/ENSRNOG00000005284/ENSRNOG00000048522/ENSRNOG00000003999/ENSRNOG00000003033/ENSRN…	-/-/Plcg2/AABR07065837.1/AABR07065643.1/Asph/Camk2b/Prkacb/Hrh1/AABR07065895.1/AABR07005779.2/Chrm3/-/Phkb/AABR07062513.1/AABR07062512.1/Ptger3/Casq2/Itpka/LOC100909648/Adcy3/Plcd3/AABR07065656.9/Gna14/Atp2a3/P2rx1/Chrm1/Ppif/-/Cd38/LOC100359978/-/Itpr3/G	35	down
rno04072	Phospholipase D signaling pathway	Environmental Information Processing; Signal transduction	19/410	176/7555	0.00309942	0.0441667	novel.1449/novel.1386/ENSRNOG00000051986/ENSRNOG00000055375/ENSRNOG00000060451/ENSRNOG00000055113/ENSRNOG00000021401/ENSRNOG00000009385/ENSRNOG00000020993/ENSRNOG00000028623/ENSRNOG00000023428/ENSRNOG00000048522/ENSRNOG00000011375/ENSRNOG00000003999/ENSRNOG00000058426/ENSRNOG00000029776/novel.1450/ENSRNOG00000001205/ENSRNOG00000052619	-/-/Plcg2/AABR07065837.1/AABR07065643.1/AABR07065895.1/Lpar5/Pik3cg/Ms4a2/Agpat5/Pik3r5/LOC100909648/Tsc2/Adcy3/AABR07065656.9/LOC100359978/-/Agpat3/AABR07065680.1	19	down
rno04512	ECM-receptor interaction	Environmental Information Processing; Signaling molecules and interaction	26/410	92/7555	1.18217e-12	1.12306e-10	ENSRNOG00000012471/ENSRNOG00000011292/ENSRNOG00000003897/ENSRNOG00000001254/ENSRNOG00000019648/ENSRNOG00000014288/ENSRNOG00000001249/ENSRNOG00000021670/ENSRNOG00000006723/ENSRNOG00000059903/ENSRNOG00000018951/ENSRNOG00000016281/ENSRNOG00000058645/ENSRNOG00000057451/ENSRNOG00000011134/novel.1284/ENSRNOG00000033581/ENSRNOG00000016538/ENSRNOG00000059894/ENSRNOG00000056772/ENSRNOG00000006569/ENSRNOG0…	Thbs4/Col1a2/Col1a1/Col6a2/Col6a3/Fn1/Col6a1/Frem2/Itga11/Thbs3/Col4a5/Col4a1/Tnc/Itga5/Lama2/-/Tnxb/Itga8/Hmmr/Col4a6/Itgb8/Col4a2/Lama4/Col6a5/Lamb1/Col4a4	26	down
rno05205	Proteoglycans in cancer	Human Diseases; Cancer: overview	26/410	213/7555	8.00225e-05	0.00214431	ENSRNOG00000011292/ENSRNOG00000003897/ENSRNOG00000004610/ENSRNOG00000051986/ENSRNOG00000010522/ENSRNOG00000014288/ENSRNOG00000052080/ENSRNOG00000004978/ENSRNOG00000007027/ENSRNOG00000012237/ENSRNOG00000054418/ENSRNOG00000057451/novel.1249/ENSRNOG00000001804/ENSRNOG00000053339/ENSRNOG00000014779/ENSRNOG00000016242/ENSRNOG00000007281/ENSRNOG00000004936/ENSRNOG00000019598/ENSRNOG00000016695/ENSRNOG0…	Col1a2/Col1a1/Lum/Plcg2/Tlr4/Fn1/Camk2b/Prkacb/Hgf/Rdx/AABR07005779.2/Itga5/-/AABR07062513.1/AABR07062512.1/Pdcd4/Fzd1/Flnc/Sdc2/Vegfa/Mmp2/Iqgap1/Igf2/Cav2/Plau/Itpr3	26	down
rno05414	Dilated cardiomyopathy (DCM)	Human Diseases; Cardiovascular disease	18/410	121/7555	8.27627e-05	0.00214431	novel.1449/novel.1386/ENSRNOG00000055375/ENSRNOG00000060451/ENSRNOG00000004978/ENSRNOG00000006723/ENSRNOG00000055113/ENSRNOG00000054418/ENSRNOG00000057451/ENSRNOG00000011134/ENSRNOG00000016538/ENSRNOG00000003999/ENSRNOG00000006569/ENSRNOG00000058426/ENSRNOG00000017912/ENSRNOG00000029776/novel.1450/ENSRNOG00000052619	-/-/AABR07065837.1/AABR07065643.1/Prkacb/Itga11/AABR07065895.1/AABR07005779.2/Itga5/Lama2/Itga8/Adcy3/Itgb8/AABR07065656.9/Atp2a3/LOC100359978/-/AABR07065680.1	18	down
rno04933	AGE-RAGE signaling pathway in diabetic complications	Human Diseases; Endocrine and metabolic disease	15/410	107/7555	0.000614273	0.0102981	ENSRNOG00000011292/ENSRNOG00000003357/ENSRNOG00000003897/ENSRNOG00000051986/ENSRNOG00000004687/ENSRNOG00000014288/ENSRNOG00000018951/ENSRNOG00000016281/ENSRNOG00000019598/ENSRNOG00000016695/ENSRNOG00000056772/ENSRNOG00000023972/ENSRNOG00000003033/ENSRNOG00000003587/ENSRNOG00000014851	Col1a2/Col3a1/Col1a1/Plcg2/Thbd/Fn1/Col4a5/Col4a1/Vegfa/Mmp2/Col4a6/Col4a2/Plcd3/Figf/Col4a4	15	down
rno05340	Primary immunodeficiency	Human Diseases; Immune disease	13/410	60/7555	1.4606e-05	0.000462525	novel.1449/novel.1386/ENSRNOG00000020125/ENSRNOG00000055375/ENSRNOG00000060451/ENSRNOG00000055113/ENSRNOG00000018311/ENSRNOG00000010265/ENSRNOG00000058426/ENSRNOG00000007664/ENSRNOG00000029776/novel.1450/ENSRNOG00000052619	-/-/Cd79a/AABR07065837.1/AABR07065643.1/AABR07065895.1/Cd19/Ada/AABR07065656.9/Tnfrsf13c/LOC100359978/-/AABR07065680.1	13	down
rno05310	Asthma	Human Diseases; Immune disease	10/410	51/7555	0.000341347	0.00748338	novel.1449/novel.1386/ENSRNOG00000055375/ENSRNOG00000060451/ENSRNOG00000055113/ENSRNOG00000020993/ENSRNOG00000058426/ENSRNOG00000029776/novel.1450/ENSRNOG00000052619	-/-/AABR07065837.1/AABR07065643.1/AABR07065895.1/Ms4a2/AABR07065656.9/LOC100359978/-/AABR07065680.1	10	down
rno05143	African trypanosomiasis	Human Diseases; Infectious disease: parasitic	17/410	65/7555	3.70814e-08	1.76137e-06	novel.1449/novel.1386/ENSRNOG00000047321/ENSRNOG00000055375/ENSRNOG00000060451/ENSRNOG00000055113/ENSRNOG00000029886/ENSRNOG00000009848/ENSRNOG00000058105/ENSRNOG00000058426/ENSRNOG00000000599/ENSRNOG00000045679/ENSRNOG00000047098/ENSRNOG00000029776/novel.1450/ENSRNOG00000061299/ENSRNOG00000052619	-/-/Hba2/AABR07065837.1/AABR07065643.1/AABR07065895.1/Hba1/Il18/Hbb/AABR07065656.9/Lama4/Apoa1/Hbb-b1/LOC100359978/-/AC113925.2/AABR07065680.1	17	down
rno05146	Amoebiasis	Human Diseases; Infectious disease: parasitic	27/410	127/7555	5.67991e-10	4.04693e-08	ENSRNOG00000011292/ENSRNOG00000003357/ENSRNOG00000003897/novel.1449/novel.1386/ENSRNOG00000053811/ENSRNOG00000010522/ENSRNOG00000055375/ENSRNOG00000014288/ENSRNOG00000060451/ENSRNOG00000004978/ENSRNOG00000018951/ENSRNOG00000016281/ENSRNOG00000055113/ENSRNOG00000054418/ENSRNOG00000011134/ENSRNOG00000056772/ENSRNOG00000023972/ENSRNOG00000058426/ENSRNOG00000014840/ENSRNOG00000000599/ENSRNOG000000297…	Col1a2/Col3a1/Col1a1/-/-/Arg2/Tlr4/AABR07065837.1/Fn1/AABR07065643.1/Prkacb/Col4a5/Col4a1/AABR07065895.1/AABR07005779.2/Lama2/Col4a6/Col4a2/AABR07065656.9/Gna14/Lama4/LOC100359978/-/Lamb1/Arg1/Col4a4/AABR07065680.1	27	down
rno05144	Malaria	Human Diseases; Infectious disease: parasitic	11/410	55/7555	0.000144027	0.00342064	ENSRNOG00000012471/ENSRNOG00000047321/ENSRNOG00000010522/ENSRNOG00000059903/ENSRNOG00000007027/ENSRNOG00000029886/ENSRNOG00000009848/ENSRNOG00000004936/ENSRNOG00000058105/ENSRNOG00000047098/ENSRNOG00000061299	Thbs4/Hba2/Tlr4/Thbs3/Hgf/Hba1/Il18/Sdc2/Hbb/Hbb-b1/AC113925.2	11	down
rno05165	Human papillomavirus infection	Human Diseases; Infectious disease: viral	34/410	354/7555	0.000767428	0.0121509	ENSRNOG00000012471/ENSRNOG00000011292/ENSRNOG00000003897/ENSRNOG00000001254/ENSRNOG00000019648/ENSRNOG00000014288/ENSRNOG00000001249/ENSRNOG00000004978/ENSRNOG00000006723/ENSRNOG00000059903/ENSRNOG00000018951/ENSRNOG00000016281/ENSRNOG00000058645/ENSRNOG00000054418/ENSRNOG00000057710/ENSRNOG00000057451/ENSRNOG00000011134/ENSRNOG00000016242/ENSRNOG00000033581/ENSRNOG00000016538/ENSRNOG00000013240/…	Thbs4/Col1a2/Col1a1/Col6a2/Col6a3/Fn1/Col6a1/Prkacb/Itga11/Thbs3/Col4a5/Col4a1/Tnc/AABR07005779.2/Ccnd2/Itga5/Lama2/Fzd1/Tnxb/Itga8/Ptger4/Ppp2r1b/Vegfa/Tcf7l1/Tsc2/Col4a6/Itgb8/Col4a2/Lama4/Col6a5/Lamb1/Notch3/Heyl/Col4a4	34	down
rno00230	Purine metabolism	Metabolism; Nucleotide metabolism	16/410	139/7555	0.00340826	0.0442339	ENSRNOG00000010280/ENSRNOG00000019005/ENSRNOG00000048275/ENSRNOG00000013994/ENSRNOG00000013791/ENSRNOG00000002128/ENSRNOG00000013048/ENSRNOG00000002101/ENSRNOG00000010265/ENSRNOG00000014443/ENSRNOG00000003999/ENSRNOG00000046763/ENSRNOG00000016321/ENSRNOG00000011068/ENSRNOG00000000065/ENSRNOG00000048561	Pde8b/Pde8a/LOC100911028/Enpp1/Enpp3/Ppat/Pde7a/Paics/Ada/Pde5a/Adcy3/Adssl1/Entpd4/Papss2/Pde6b/Hprt1	16	down
rno04972	Pancreatic secretion	Organismal Systems; Digestive system	21/410	102/7555	8.79948e-08	3.58265e-06	ENSRNOG00000060831/ENSRNOG00000019068/ENSRNOG00000016798/ENSRNOG00000011181/ENSRNOG00000016647/ENSRNOG00000021619/ENSRNOG00000003164/ENSRNOG00000055613/ENSRNOG00000049410/ENSRNOG00000030904/ENSRNOG00000013771/novel.1249/ENSRNOG00000001804/ENSRNOG00000053339/ENSRNOG00000003999/ENSRNOG00000010406/ENSRNOG00000017912/ENSRNOG00000013382/ENSRNOG00000003069/ENSRNOG00000052795/ENSRNOG00000011582	Clca1/Ctrb1/Pla2g2f/Cpa3/Pla2g2c/Cela3b/Pla2g10/Amy2a3/Chrm3/Cpb1/Clca2/-/AABR07062513.1/AABR07062512.1/Adcy3/Cel/Atp2a3/Prss3/Cd38/Itpr3/Rab3d	21	down
rno04974	Protein digestion and absorption	Organismal Systems; Digestive system	27/410	92/7555	1.55498e-13	4.43171e-11	ENSRNOG00000011292/ENSRNOG00000003357/ENSRNOG00000003897/ENSRNOG00000003736/ENSRNOG00000019068/ENSRNOG00000026415/ENSRNOG00000008749/ENSRNOG00000011181/ENSRNOG00000001254/ENSRNOG00000001469/ENSRNOG00000020525/ENSRNOG00000019648/ENSRNOG00000001249/ENSRNOG00000014816/ENSRNOG00000021619/ENSRNOG00000018951/ENSRNOG00000016281/ENSRNOG00000058470/ENSRNOG00000030763/ENSRNOG00000030904/ENSRNOG00000056772/…	Col1a2/Col3a1/Col1a1/Col5a2/Ctrb1/Col14a1/Col5a1/Cpa3/Col6a2/Eln/Col5a3/Col6a3/Col6a1/Slc1a1/Cela3b/Col4a5/Col4a1/Col12a1/Dpp4/Cpb1/Col4a6/Col4a2/Slc7a15/Col17a1/Prss3/Col6a5/Col4a4	27	down
rno04913	Ovarian steroidogenesis	Organismal Systems; Endocrine system	8/410	47/7555	0.00341455	0.0442339	ENSRNOG00000021735/ENSRNOG00000012972/ENSRNOG00000004978/ENSRNOG00000013717/ENSRNOG00000054418/ENSRNOG00000055221/ENSRNOG00000019500/ENSRNOG00000003999	Akr1cl/Alox5/Prkacb/Bmp6/AABR07005779.2/AC128618.1/Cyp1a1/Adcy3	8	down
rno04672	Intestinal immune network for IgA production	Organismal Systems; Immune system	12/410	71/7555	0.000384002	0.00764685	novel.1449/novel.1386/ENSRNOG00000059640/ENSRNOG00000004405/ENSRNOG00000055375/ENSRNOG00000060451/ENSRNOG00000055113/ENSRNOG00000058426/ENSRNOG00000007664/ENSRNOG00000029776/novel.1450/ENSRNOG00000052619	-/-/Ccl28/Pigr/AABR07065837.1/AABR07065643.1/AABR07065895.1/AABR07065656.9/Tnfrsf13c/LOC100359978/-/AABR07065680.1	12	down
rno04640	Hematopoietic cell lineage	Organismal Systems; Immune system	16/410	114/7555	0.000402466	0.00764685	novel.1449/novel.1386/ENSRNOG00000019556/ENSRNOG00000055375/ENSRNOG00000060451/ENSRNOG00000045558/ENSRNOG00000055113/ENSRNOG00000000321/ENSRNOG00000057451/ENSRNOG00000018311/ENSRNOG00000020945/ENSRNOG00000058426/ENSRNOG00000003069/ENSRNOG00000029776/novel.1450/ENSRNOG00000052619	-/-/Cd9/AABR07065837.1/AABR07065643.1/Cd34/AABR07065895.1/Cd24/Itga5/Cd19/Ms4a1/AABR07065656.9/Cd38/LOC100359978/-/AABR07065680.1	16	down
rno04611	Platelet activation	Organismal Systems; Immune system	16/410	128/7555	0.00145129	0.0217693	ENSRNOG00000011292/ENSRNOG00000003357/ENSRNOG00000003897/ENSRNOG00000005404/ENSRNOG00000051986/ENSRNOG00000004978/ENSRNOG00000009385/ENSRNOG00000054418/novel.1249/ENSRNOG00000001804/ENSRNOG00000053339/ENSRNOG00000023428/ENSRNOG00000018373/ENSRNOG00000003999/ENSRNOG00000017606/ENSRNOG00000052795	Col1a2/Col3a1/Col1a1/Rasgrp1/Plcg2/Prkacb/Pik3cg/AABR07005779.2/-/AABR07062513.1/AABR07062512.1/Pik3r5/Tln2/Adcy3/P2rx1/Itpr3	16	down
rno04750	Inflammatory mediator regulation of TRP channels	Organismal Systems; Sensory system	15/410	107/7555	0.000614273	0.0102981	ENSRNOG00000051986/ENSRNOG00000019606/ENSRNOG00000052080/ENSRNOG00000004978/ENSRNOG00000007420/ENSRNOG00000019486/ENSRNOG00000054418/ENSRNOG00000007354/novel.1249/ENSRNOG00000001804/ENSRNOG00000053339/ENSRNOG00000013240/ENSRNOG00000003999/ENSRNOG00000052795/ENSRNOG00000019074	Plcg2/Trpv3/Camk2b/Prkacb/Hrh1/Trpv1/AABR07005779.2/Trpa1/-/AABR07062513.1/AABR07062512.1/Ptger4/Adcy3/Itpr3/Alox12e	15	down
rno04145	Phagosome	Cellular Processes; Transport and catabolism	26/481	217/7555	0.00128449	0.0200111	ENSRNOG00000000777/ENSRNOG00000030666/ENSRNOG00000045924/ENSRNOG00000000457/ENSRNOG00000024382/ENSRNOG00000038999/ENSRNOG00000042905/ENSRNOG00000000455/ENSRNOG00000000795/ENSRNOG00000017819/ENSRNOG00000022107/ENSRNOG00000000723/ENSRNOG00000046834/ENSRNOG00000040108/ENSRNOG00000017445/ENSRNOG00000058238/ENSRNOG00000048140/ENSRNOG00000021199/ENSRNOG00000021157/ENSRNOG00000031090/ENSRNOG00000005906/…	RT1-S3/RT1-T18/RT1-T24-3/Tap1/Fcgr3a/RT1-A1/RT1-T24-4/Tap2/RT1-N3/Cd14/RT1-M6-1/RT1-CE5/C3/Cd36/Tubb2b/Rn60_20_0046.8/Rn60_20_0048.4/Fcgr1a/Ctss/RT1-CE7/LOC685953/Olr1/RT1-N2/Tuba1c/Mpo/Clec7a	26	up
rno04060	Cytokine-cytokine receptor interaction	Environmental Information Processing; Signaling molecules and interaction	30/481	240/7555	0.000269089	0.00612695	ENSRNOG00000010906/ENSRNOG00000002381/ENSRNOG00000050123/ENSRNOG00000006620/ENSRNOG00000013007/ENSRNOG00000058566/ENSRNOG00000007335/ENSRNOG00000017602/ENSRNOG00000037814/ENSRNOG00000016326/ENSRNOG00000028598/ENSRNOG00000028043/ENSRNOG00000015615/ENSRNOG00000022298/ENSRNOG00000006046/ENSRNOG00000034290/ENSRNOG00000004575/ENSRNOG00000015992/ENSRNOG00000015441/ENSRNOG00000019142/ENSRNOG00000026647/…	Ccl5/Bmp3/Gdf5/Xcr1/Il17c/Ltb/Ccl11/Il34/Cxcl17/Cx3cl1/Edar/Cxcl3/Tnfrsf11a/Cxcl11/Gdf7/Ccl21/Il1a/Ccl20/Il4r/Fas/Cxcl16/Prlr/Lif/Tnfsf10/Il2rb/Tnfrsf9/Ifngr2/Il11ra1/Relt/Ifngr1	30	up
rno04514	Cell adhesion molecules (CAMs)	Genes and Proteins; Protein families: signaling and cellular processes	22/481	163/7555	0.00061743	0.012184	ENSRNOG00000000777/ENSRNOG00000030666/ENSRNOG00000045924/ENSRNOG00000038835/ENSRNOG00000001571/ENSRNOG00000021243/ENSRNOG00000038999/ENSRNOG00000042905/ENSRNOG00000019202/ENSRNOG00000008098/ENSRNOG00000001926/ENSRNOG00000000795/ENSRNOG00000038197/ENSRNOG00000022107/ENSRNOG00000027691/ENSRNOG00000002723/ENSRNOG00000000723/ENSRNOG00000020409/ENSRNOG00000058238/ENSRNOG00000048140/ENSRNOG00000031090/…	RT1-S3/RT1-T18/RT1-T24-3/Cd86/Cldn8/Siglec1/RT1-A1/RT1-T24-4/PVR/Lrrc4/Cldn1/RT1-N3/Cd226/RT1-M6-1/Cldn17/Sele/RT1-CE5/AABR07006111.1/Rn60_20_0046.8/Rn60_20_0048.4/RT1-CE7/RT1-N2	22	up
rno05204	Chemical carcinogenesis	Human Diseases; Cancer: overview	11/481	60/7555	0.001233	0.0200111	ENSRNOG00000007743/ENSRNOG00000012458/ENSRNOG00000019342/ENSRNOG00000004245/ENSRNOG00000013484/ENSRNOG00000013241/ENSRNOG00000003606/ENSRNOG00000052070/ENSRNOG00000033402/ENSRNOG00000017512/ENSRNOG00000019221	Mgst1/Cyp2e1/Sult1a1/Mgst3/Gsta1/Cyp2c13/RGD1561381/Aldh1a3/LOC501110/Aldh3b1/Gstm4	11	up
rno05416	Viral myocarditis	Human Diseases; Cardiovascular disease	16/481	118/7555	0.00315043	0.0388553	ENSRNOG00000000777/ENSRNOG00000030666/ENSRNOG00000045924/ENSRNOG00000038835/ENSRNOG00000038999/ENSRNOG00000042905/ENSRNOG00000010475/ENSRNOG00000000795/ENSRNOG00000022107/ENSRNOG00000000562/ENSRNOG00000000723/ENSRNOG00000058238/ENSRNOG00000048140/ENSRNOG00000031090/ENSRNOG00000012439/ENSRNOG00000029386	RT1-S3/RT1-T18/RT1-T24-3/Cd86/RT1-A1/RT1-T24-4/Casp3/RT1-N3/RT1-M6-1/Prf1/RT1-CE5/Rn60_20_0046.8/Rn60_20_0048.4/RT1-CE7/Bid/RT1-N2	16	up
rno04940	Type I diabetes mellitus	Human Diseases; Endocrine and metabolic disease	17/481	64/7555	2.94928e-07	1.74598e-05	ENSRNOG00000000777/ENSRNOG00000030666/ENSRNOG00000045924/ENSRNOG00000038835/ENSRNOG00000038999/ENSRNOG00000045973/ENSRNOG00000042905/ENSRNOG00000000795/ENSRNOG00000022107/ENSRNOG00000000562/ENSRNOG00000000723/ENSRNOG00000004575/ENSRNOG00000058238/ENSRNOG00000019142/ENSRNOG00000048140/ENSRNOG00000031090/ENSRNOG00000029386	RT1-S3/RT1-T18/RT1-T24-3/Cd86/RT1-A1/Gzmb/RT1-T24-4/RT1-N3/RT1-M6-1/Prf1/RT1-CE5/Il1a/Rn60_20_0046.8/Fas/Rn60_20_0048.4/RT1-CE7/RT1-N2	17	up
rno05332	Graft-versus-host disease	Human Diseases; Immune disease	17/481	59/7555	7.99478e-08	9.40632e-06	ENSRNOG00000000777/ENSRNOG00000030666/ENSRNOG00000045924/ENSRNOG00000038835/ENSRNOG00000038999/ENSRNOG00000045973/ENSRNOG00000042905/ENSRNOG00000000795/ENSRNOG00000022107/ENSRNOG00000000562/ENSRNOG00000000723/ENSRNOG00000004575/ENSRNOG00000058238/ENSRNOG00000019142/ENSRNOG00000048140/ENSRNOG00000031090/ENSRNOG00000029386	RT1-S3/RT1-T18/RT1-T24-3/Cd86/RT1-A1/Gzmb/RT1-T24-4/RT1-N3/RT1-M6-1/Prf1/RT1-CE5/Il1a/Rn60_20_0046.8/Fas/Rn60_20_0048.4/RT1-CE7/RT1-N2	17	up
rno05320	Autoimmune thyroid disease	Human Diseases; Immune disease	17/481	88/7555	3.14336e-05	0.00103382	ENSRNOG00000003972/ENSRNOG00000000777/ENSRNOG00000030666/ENSRNOG00000045924/ENSRNOG00000038835/ENSRNOG00000038999/ENSRNOG00000045973/ENSRNOG00000042905/ENSRNOG00000000795/ENSRNOG00000022107/ENSRNOG00000000562/ENSRNOG00000000723/ENSRNOG00000058238/ENSRNOG00000019142/ENSRNOG00000048140/ENSRNOG00000031090/ENSRNOG00000029386	Tshr/RT1-S3/RT1-T18/RT1-T24-3/Cd86/RT1-A1/Gzmb/RT1-T24-4/RT1-N3/RT1-M6-1/Prf1/RT1-CE5/Rn60_20_0046.8/Fas/Rn60_20_0048.4/RT1-CE7/RT1-N2	17	up
rno05330	Allograft rejection	Human Diseases; Immune disease	16/481	87/7555	9.95155e-05	0.00290141	ENSRNOG00000000777/ENSRNOG00000030666/ENSRNOG00000045924/ENSRNOG00000038835/ENSRNOG00000038999/ENSRNOG00000045973/ENSRNOG00000042905/ENSRNOG00000000795/ENSRNOG00000022107/ENSRNOG00000000562/ENSRNOG00000000723/ENSRNOG00000058238/ENSRNOG00000019142/ENSRNOG00000048140/ENSRNOG00000031090/ENSRNOG00000029386	RT1-S3/RT1-T18/RT1-T24-3/Cd86/RT1-A1/Gzmb/RT1-T24-4/RT1-N3/RT1-M6-1/Prf1/RT1-CE5/Rn60_20_0046.8/Fas/Rn60_20_0048.4/RT1-CE7/RT1-N2	16	up
rno05150	Staphylococcus aureus infection	Human Diseases; Infectious disease: bacterial	23/481	105/7555	1.19801e-07	9.40632e-06	ENSRNOG00000046075/ENSRNOG00000029522/ENSRNOG00000030729/ENSRNOG00000000443/ENSRNOG00000046453/ENSRNOG00000024382/ENSRNOG00000051235/ENSRNOG00000053400/ENSRNOG00000033564/ENSRNOG00000051158/ENSRNOG00000038135/ENSRNOG00000028707/ENSRNOG00000046834/ENSRNOG00000012807/ENSRNOG00000013611/ENSRNOG00000012749/ENSRNOG00000014441/ENSRNOG00000030093/ENSRNOG00000021199/ENSRNOG00000047657/ENSRNOG00000012804/…	Defa8/Defa6/C4b/C4a/Defa9/Fcgr3a/C2/Cfi/Cfd/C2/RatNP-3b/Np4/C3/C1qa/Krt32/C1qb/Krt16/Defa5/Fcgr1a/C4a/C1qc/-/C1s	23	up
rno05133	Pertussis	Human Diseases; Infectious disease: bacterial	18/481	74/7555	5.56183e-07	2.74383e-05	ENSRNOG00000030729/ENSRNOG00000000443/ENSRNOG00000007372/ENSRNOG00000051235/ENSRNOG00000007457/ENSRNOG00000010475/ENSRNOG00000019675/ENSRNOG00000017819/ENSRNOG00000008144/ENSRNOG00000046834/ENSRNOG00000012807/ENSRNOG00000012749/ENSRNOG00000004575/ENSRNOG00000047657/ENSRNOG00000031955/ENSRNOG00000012804/ENSRNOG00000020660/ENSRNOG00000011971	C4b/C4a/Casp1/C2/Serping1/Casp3/Pycard/Cd14/Irf1/C3/C1qa/C1qb/Il1a/C4a/Calml3/C1qc/Cfl1/C1s	18	up
rno05164	Influenza A	Human Diseases; Infectious disease: viral	25/481	161/7555	2.62676e-05	0.000971902	ENSRNOG00000017414/ENSRNOG00000059207/ENSRNOG00000001369/ENSRNOG00000049282/ENSRNOG00000019478/ENSRNOG00000010906/ENSRNOG00000001959/ENSRNOG00000007372/ENSRNOG00000001963/ENSRNOG00000007539/ENSRNOG00000047076/ENSRNOG00000048315/ENSRNOG00000031081/ENSRNOG00000010475/ENSRNOG00000019675/ENSRNOG00000004249/ENSRNOG00000027017/ENSRNOG00000006384/ENSRNOG00000004575/ENSRNOG00000019142/ENSRNOG00000050258/…	Irf7/Oas3/Oas1a/Oas2/Irf9/Ccl5/Mx1/Casp1/Mx2/Rsad2/Oas1i/Eif2ak2/Stat2/Casp3/Pycard/Tlr7/Rnasel/Ddx58/Il1a/Fas/Ccnd3/Tnfsf10/Bid/Ifngr2/Ifngr1	25	up
rno05169	Epstein-Barr virus infection	Human Diseases; Infectious disease: viral	32/481	250/7555	0.000107823	0.00290141	ENSRNOG00000017414/ENSRNOG00000059207/ENSRNOG00000001369/ENSRNOG00000021802/ENSRNOG00000049282/ENSRNOG00000000777/ENSRNOG00000019478/ENSRNOG00000030666/ENSRNOG00000045924/ENSRNOG00000000457/ENSRNOG00000017123/ENSRNOG00000038999/ENSRNOG00000047076/ENSRNOG00000042905/ENSRNOG00000000455/novel.88/ENSRNOG00000048315/ENSRNOG00000031081/ENSRNOG00000010475/ENSRNOG00000000795/ENSRNOG00000022107/ENSRNOG000…	Irf7/Oas3/Oas1a/Isg15/Oas2/RT1-S3/Irf9/RT1-T18/RT1-T24-3/Tap1/B2m/RT1-A1/Oas1i/RT1-T24-4/Tap2/-/Eif2ak2/Stat2/Casp3/RT1-N3/RT1-M6-1/RT1-CE5/Ddx58/Tapbp/Rn60_20_0046.8/Fas/Rn60_20_0048.4/RT1-CE7/Ccnd3/Bid/Relb/RT1-N2	32	up
rno05168	Herpes simplex virus 1 infection	Human Diseases; Infectious disease: viral	41/481	389/7555	0.000872194	0.0158311	ENSRNOG00000017414/ENSRNOG00000059207/ENSRNOG00000001369/ENSRNOG00000049282/ENSRNOG00000000777/ENSRNOG00000019478/ENSRNOG00000010906/ENSRNOG00000030666/ENSRNOG00000045924/ENSRNOG00000000457/ENSRNOG00000059900/ENSRNOG00000017123/ENSRNOG00000038999/ENSRNOG00000047076/ENSRNOG00000042905/ENSRNOG00000000455/ENSRNOG00000028662/ENSRNOG00000048315/ENSRNOG00000031081/ENSRNOG00000042137/ENSRNOG00000010475/…	Irf7/Oas3/Oas1a/Oas2/RT1-S3/Irf9/Ccl5/RT1-T18/RT1-T24-3/Tap1/Bst2/B2m/RT1-A1/Oas1i/RT1-T24-4/Tap2/Zfp69/Eif2ak2/Stat2/Tmem173/Casp3/RT1-N3/-/Zim1/RT1-M6-1/Rnasel/RT1-CE5/Ddx58/C3/Cfp/Tapbp/Rn60_20_0046.8/Fas/Rn60_20_0048.4/RT1-CE7/Sp100/Zfp551/Bid/Ifngr2/RT1-N2/Ifngr1	41	up
rno05167	Kaposi sarcoma-associated herpesvirus infection	Human Diseases; Infectious disease: viral	26/481	212/7555	0.000909216	0.0158311	ENSRNOG00000017414/ENSRNOG00000000777/ENSRNOG00000019478/ENSRNOG00000030666/ENSRNOG00000045924/ENSRNOG00000038835/ENSRNOG00000038999/ENSRNOG00000042905/ENSRNOG00000048315/ENSRNOG00000031081/ENSRNOG00000010475/ENSRNOG00000000795/ENSRNOG00000022107/ENSRNOG00000028043/ENSRNOG00000000723/ENSRNOG00000046834/ENSRNOG00000047080/ENSRNOG00000006108/ENSRNOG00000058238/ENSRNOG00000019142/ENSRNOG00000048140/…	Irf7/RT1-S3/Irf9/RT1-T18/RT1-T24-3/Cd86/RT1-A1/RT1-T24-4/Eif2ak2/Stat2/Casp3/RT1-N3/RT1-M6-1/Cxcl3/RT1-CE5/C3/Gng4/Gngt2/Rn60_20_0046.8/Fas/Rn60_20_0048.4/RT1-CE7/Calml3/Bid/RT1-N2/Ifngr1	26	up
rno05170	Human immunodeficiency virus 1 infection	Human Diseases; Infectious disease: viral	28/481	241/7555	0.00136522	0.0202053	ENSRNOG00000000777/ENSRNOG00000030666/ENSRNOG00000045924/ENSRNOG00000000457/ENSRNOG00000059900/ENSRNOG00000017123/ENSRNOG00000038999/ENSRNOG00000042905/ENSRNOG00000000455/ENSRNOG00000042137/ENSRNOG00000010475/ENSRNOG00000000795/ENSRNOG00000022107/ENSRNOG00000000723/ENSRNOG00000047080/ENSRNOG00000029500/ENSRNOG00000006108/ENSRNOG00000058238/ENSRNOG00000019142/ENSRNOG00000048140/ENSRNOG00000031090/…	RT1-S3/RT1-T18/RT1-T24-3/Tap1/Bst2/B2m/RT1-A1/RT1-T24-4/Tap2/Tmem173/Casp3/RT1-N3/RT1-M6-1/RT1-CE5/Gng4/Tapbp/Gngt2/Rn60_20_0046.8/Fas/Rn60_20_0048.4/RT1-CE7/Calml3/Bid/Cfl1/Trim5/RT1-N2/-/Rnf7	28	up
rno05160	Hepatitis C	Human Diseases; Infectious disease: viral	20/481	153/7555	0.00160531	0.0226272	ENSRNOG00000017414/ENSRNOG00000059207/ENSRNOG00000001369/ENSRNOG00000049282/ENSRNOG00000019478/ENSRNOG00000036603/ENSRNOG00000001959/ENSRNOG00000001963/ENSRNOG00000007539/ENSRNOG00000001571/ENSRNOG00000047076/ENSRNOG00000048315/ENSRNOG00000031081/ENSRNOG00000010475/ENSRNOG00000001926/ENSRNOG00000027017/ENSRNOG00000027691/ENSRNOG00000006384/ENSRNOG00000019142/ENSRNOG00000012439	Irf7/Oas3/Oas1a/Oas2/Irf9/Ifit1lb/Mx1/Mx2/Rsad2/Cldn8/Oas1i/Eif2ak2/Stat2/Casp3/Cldn1/Rnasel/Cldn17/Ddx58/Fas/Bid	20	up
rno00910	Nitrogen metabolism	Metabolism; Energy metabolism	5/481	16/7555	0.0024863	0.0328096	ENSRNOG00000002916/ENSRNOG00000021323/ENSRNOG00000005669/ENSRNOG00000010698/ENSRNOG00000023162	Car4/Car13/Car8/Car1/Car14	5	up
rno00982	Drug metabolism - cytochrome P450	Metabolism; Xenobiotics biodegradation and metabolism	11/481	48/7555	0.000162676	0.00401269	ENSRNOG00000007743/ENSRNOG00000012458/ENSRNOG00000004245/ENSRNOG00000013484/ENSRNOG00000015354/ENSRNOG00000003606/ENSRNOG00000003620/ENSRNOG00000052070/ENSRNOG00000033402/ENSRNOG00000017512/ENSRNOG00000019221	Mgst1/Cyp2e1/Mgst3/Gsta1/Aox1/RGD1561381/Fmo3/Aldh1a3/LOC501110/Aldh3b1/Gstm4	11	up
rno00983	Drug metabolism - other enzymes	Metabolism; Xenobiotics biodegradation and metabolism	12/481	75/7555	0.0025494	0.0328096	ENSRNOG00000007743/ENSRNOG00000012458/ENSRNOG00000007081/ENSRNOG00000004245/ENSRNOG00000013484/ENSRNOG00000048823/ENSRNOG00000055064/ENSRNOG00000003606/ENSRNOG00000033402/ENSRNOG00000048039/ENSRNOG00000019221/ENSRNOG00000008310	Mgst1/Cyp2e1/Xdh/Mgst3/Gsta1/LOC100910259/AABR07007146.1/RGD1561381/LOC501110/LOC679149/Gstm4/Mpo	12	up
rno03320	PPAR signaling pathway	Organismal Systems; Endocrine system	14/481	82/7555	0.000593148	0.012184	ENSRNOG00000006675/ENSRNOG00000049075/ENSRNOG00000010805/ENSRNOG00000010128/ENSRNOG00000007545/ENSRNOG00000008839/ENSRNOG00000040108/ENSRNOG00000047549/ENSRNOG00000015086/ENSRNOG00000005906/ENSRNOG00000001821/ENSRNOG00000047046/ENSRNOG00000056219/ENSRNOG00000012966	Fabp1/Fabp5/Fabp4/Slc27a2/Angptl4/Pparg/Cd36/LOC316124/Plin1/LOC685953/Adipoq/Plin4/Olr1/Acadl	14	up
rno04610	Complement and coagulation cascades	Organismal Systems; Immune system	21/481	76/7555	5.38906e-09	1.59516e-06	ENSRNOG00000030729/ENSRNOG00000024115/ENSRNOG00000000443/ENSRNOG00000019018/ENSRNOG00000038132/ENSRNOG00000051235/ENSRNOG00000037931/ENSRNOG00000053400/ENSRNOG00000007457/ENSRNOG00000033564/ENSRNOG00000051158/ENSRNOG00000033444/ENSRNOG00000010935/ENSRNOG00000046834/ENSRNOG00000012807/ENSRNOG00000012749/ENSRNOG00000047300/ENSRNOG00000047657/ENSRNOG00000014376/ENSRNOG00000012804/ENSRNOG00000011971	C4b/C6/C4a/Plat/Vsig4/C2/Plaur/Cfi/Serping1/Cfd/C2/F10/Cpb2/C3/C1qa/C1qb/Bdkrb2/C4a/Proc/C1qc/C1s	21	up
rno04621	NOD-like receptor signaling pathway	Organismal Systems; Immune system	31/481	174/7555	1.27112e-07	9.40632e-06	ENSRNOG00000017414/ENSRNOG00000059207/ENSRNOG00000001369/ENSRNOG00000049282/ENSRNOG00000046075/ENSRNOG00000029522/ENSRNOG00000019478/ENSRNOG00000046453/ENSRNOG00000010906/ENSRNOG00000007728/ENSRNOG00000032240/ENSRNOG00000007372/ENSRNOG00000047076/ENSRNOG00000020465/ENSRNOG00000019438/ENSRNOG00000031081/ENSRNOG00000028768/ENSRNOG00000031743/ENSRNOG00000042137/ENSRNOG00000038135/ENSRNOG00000009754/…	Irf7/Oas3/Oas1a/Oas2/Defa8/Defa6/Irf9/Defa9/Ccl5/Gsdmd/Gbp5/Casp1/Oas1i/Ripk3/Rnf31/Stat2/Gbp4/Gbp2/Tmem173/RatNP-3b/Nampt/Pycard/Np4/Rnasel/Cxcl3/LOC685067/Ctsb/Trip6/Defa5/-/-	31	up
rno04612	Antigen processing and presentation	Organismal Systems; Immune system	20/481	98/7555	2.62322e-06	0.000110925	ENSRNOG00000000777/ENSRNOG00000030666/ENSRNOG00000045924/ENSRNOG00000000457/ENSRNOG00000017123/ENSRNOG00000038999/ENSRNOG00000019246/ENSRNOG00000042905/ENSRNOG00000000455/ENSRNOG00000000795/ENSRNOG00000022107/ENSRNOG00000007089/ENSRNOG00000000723/ENSRNOG00000010331/ENSRNOG00000029500/ENSRNOG00000058238/ENSRNOG00000048140/ENSRNOG00000021157/ENSRNOG00000031090/ENSRNOG00000029386	RT1-S3/RT1-T18/RT1-T24-3/Tap1/B2m/RT1-A1/Psme2/RT1-T24-4/Tap2/RT1-N3/RT1-M6-1/Lgmn/RT1-CE5/Ctsb/Tapbp/Rn60_20_0046.8/Rn60_20_0048.4/Ctss/RT1-CE7/RT1-N2	20	up
rno04623	Cytosolic DNA-sensing pathway	Organismal Systems; Immune system	9/481	50/7555	0.00383468	0.0454026	ENSRNOG00000017414/ENSRNOG00000010906/ENSRNOG00000006314/ENSRNOG00000007372/ENSRNOG00000020465/ENSRNOG00000022540/ENSRNOG00000042137/ENSRNOG00000019675/ENSRNOG00000006384	Irf7/Ccl5/Zbp1/Casp1/Ripk3/Trex1/Tmem173/Pycard/Ddx58	9	up
